# Supplementary material
Source: Springer Nature journal article supplement (https://www.springermedizin.de/resource/supplementary/13019_2010_366_MOESM5_ESM.pdf/9638592)

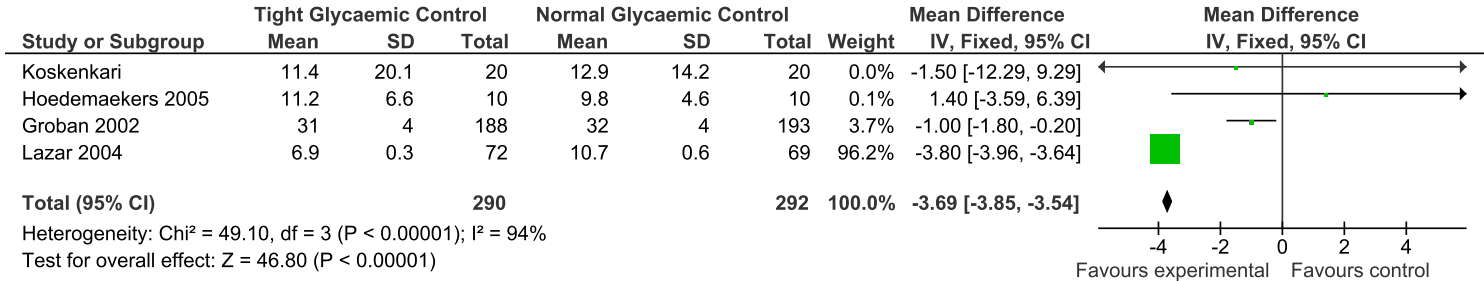

Supplement: MOESM5 [file 9638592]
